# Supplementary material for: Determination of phosphatidylcholine in soybean lecithin samples by high performance liquid chromatography on titania
Source: Royal Society of Chemistry journal article supplement (doi:10.1039/c0ay00419g), 2010-01-01
Supplement: c0ay00419g.pdf [file c0ay00419g.pdf]

**Electronic Supplementary Information Determination of  
phosphatidylcholine in soybean lecithin samples by high  
performance liquid chromatography on titania**

**Jing Zhao, Zi-Tao Jiang,\* Guan-Ru Lu, Jin Tan and Rong Li**

Tianjin Key Laboratory of Food Biotechnology, College of Biotechnology and Food  
Science, Tianjin University of Commerce, Tianjin 300134, China.

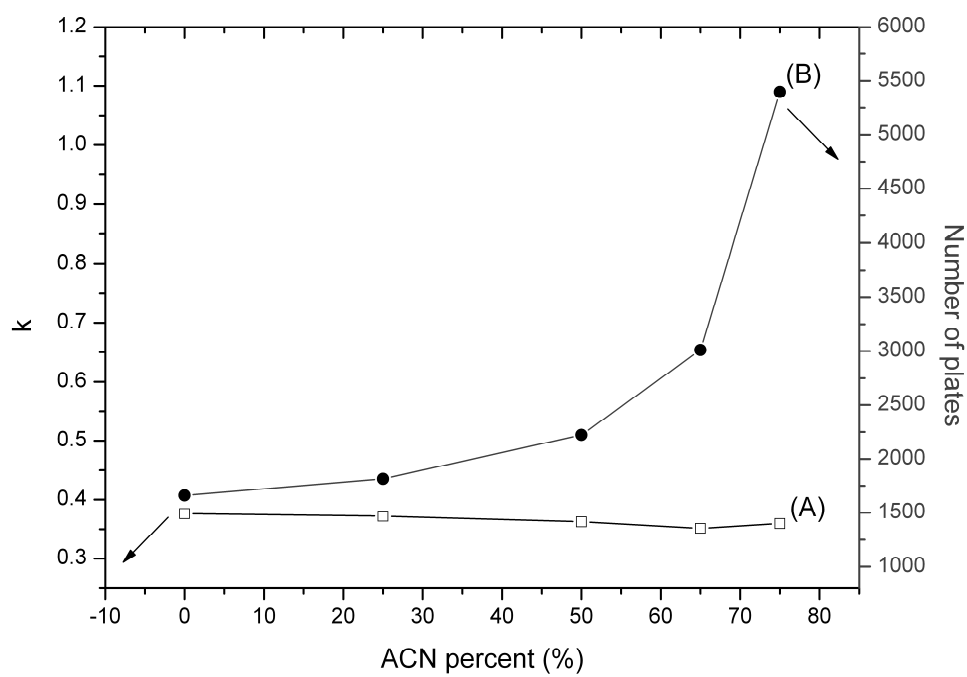

**Figure S1.** Effect of solvent in sample on retention factor (A) and efficiency (B) of PC on titania. Condition: flow rate, 1.0 mL/min; eluent, MeOH/ACN/water = 10/75/15 (v/v/v), 1 mM phosphate buffer, pH 7.0; analyte, 0.1 mg/mL PC; column temperature, 40°C; injection, 20  $\mu$ L; UV detection at 205 nm.

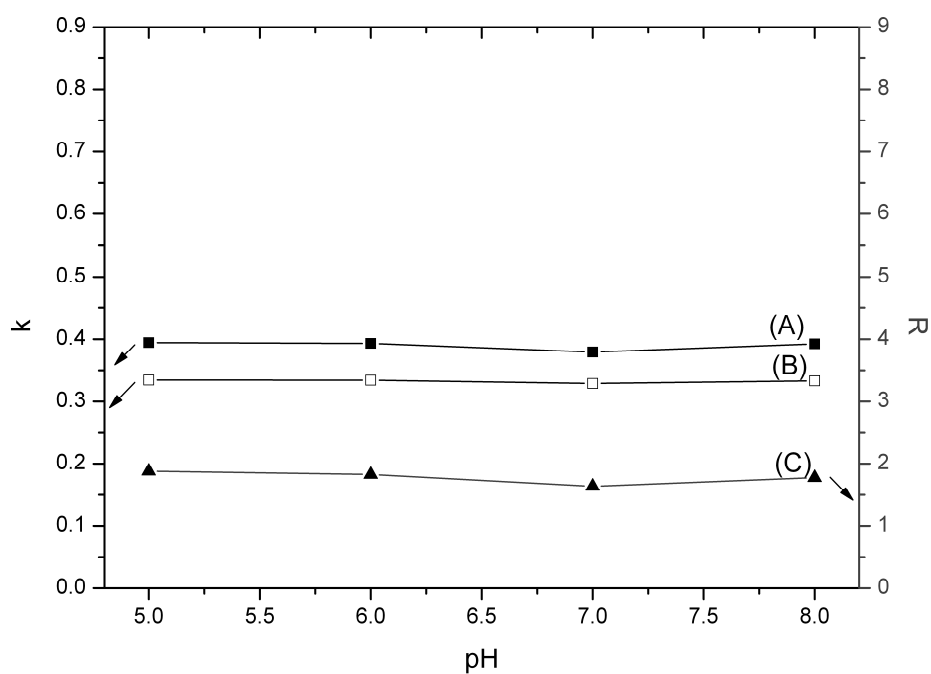

**Figure S2.** Effect of pH on retention factor ( $k$ ) and resolution ( $R$ ) of PC on titania. (A) PC retention factor, (B) glycerol monostearate retention factor, (C) resolution in PC-50 sample; Condition: flow rate, 1.0 mL/min; eluent, MeOH/ACN/water=10/75/15 (v/v/v), 1 mM phosphate buffer, pH 5.0, 6.0, 7.0 and 8.0; analyte, 0.1 mg/mL PC, 4 mg/mL glycerol monostearate and 0.5 mg/mL PC-50 sample; column temperature, 40°C; injection, 20  $\mu$ L; UV detection at 205 nm.

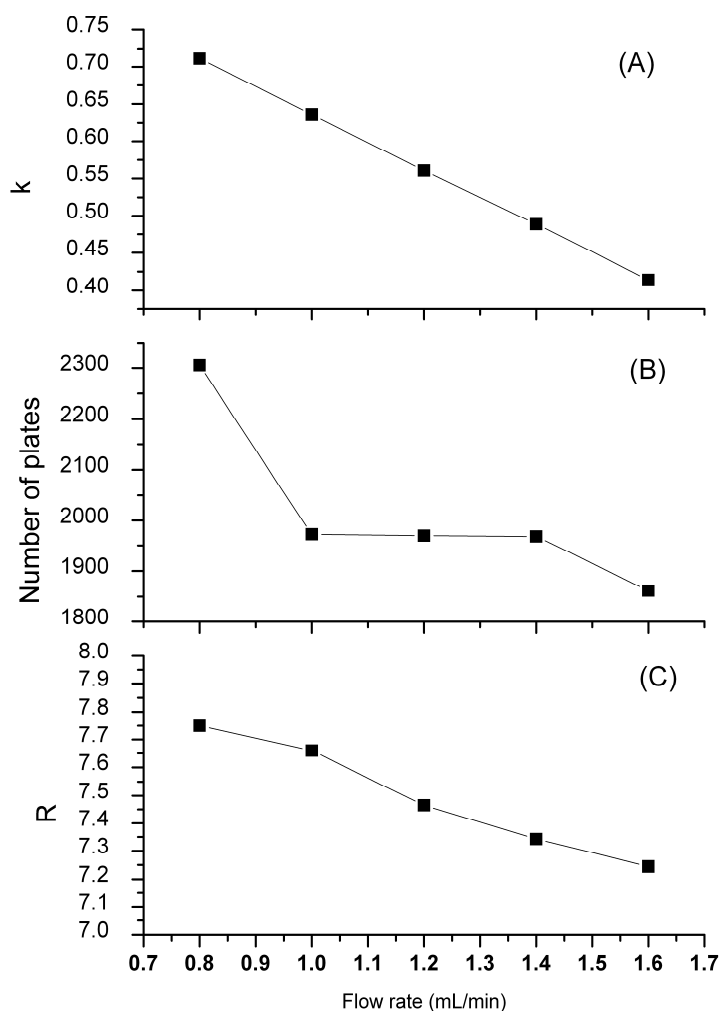

**Figure S3.** Effect of flow rate on PC retention factor (A), efficiency (B) and resolution (C) of PC on titania. Condition: flow rate, 0.8, 1.0, 1.2, 1.4, 1.6 mL/min; eluent, MeOH/ACN/water = 10/80/10 (v/v/v), no buffer presents; analyte, 0.1 mg/mL PC; column temperature, 40°C; injection, 20  $\mu$ L; UV detection at 205 nm.

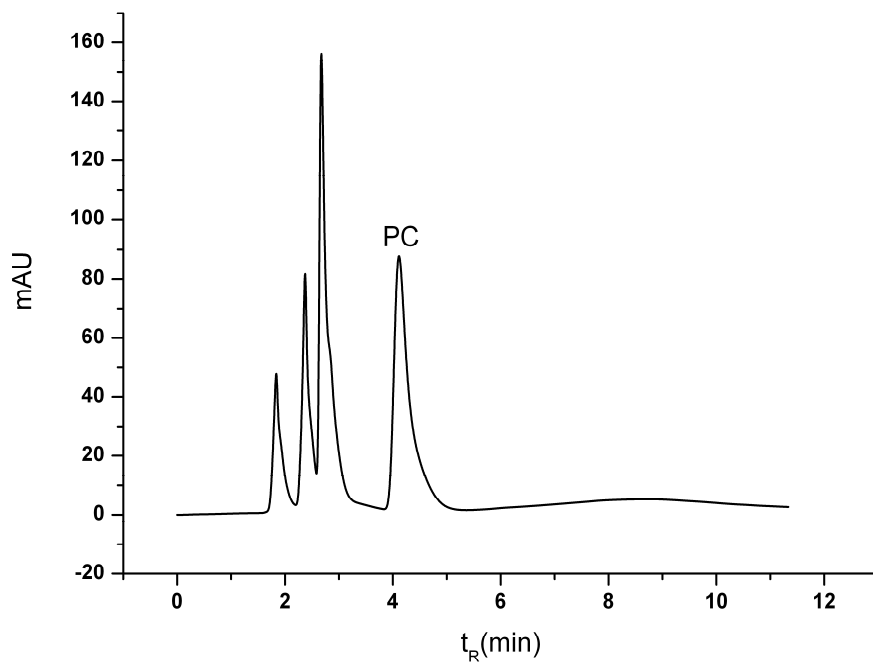

**Figure S4.** Chromatogram of lecithin capsules of Cal-SUM on titania. Condition: flow rate, 1.0 mL/min; eluent, MeOH/ACN/water = 10/79/11 (v/v/v), no phosphate buffer presents; analyte, 1 mg/mL Cal-SUM capsules; column temperature, 40°C; injection, 20  $\mu$ L; UV detection at 205 nm.

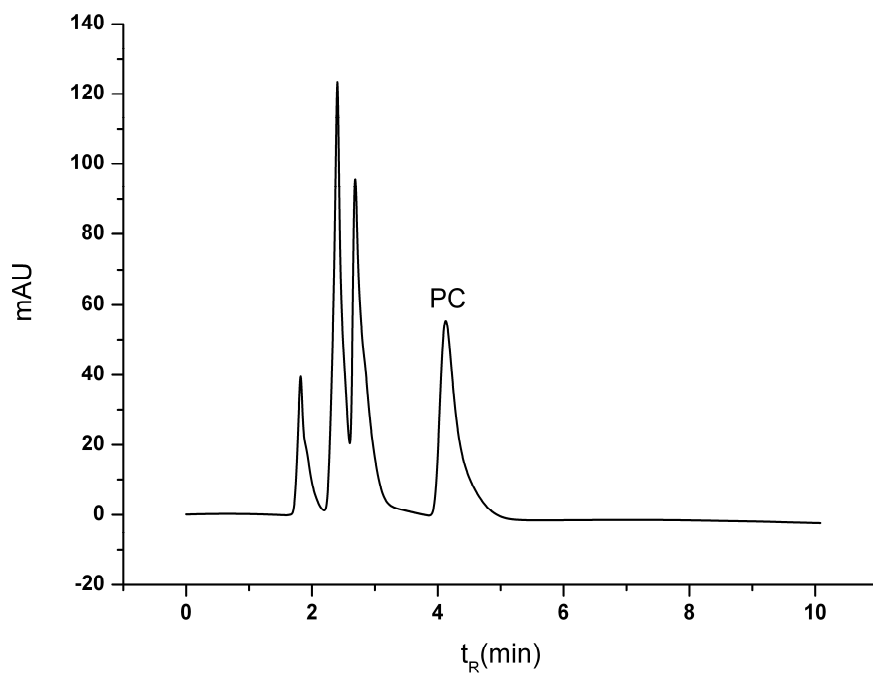

**Figure S5.** Chromatogram of lecithin capsules of Tomvitm on titania. Condition: flow rate, 1.0mL/min; eluent, methanol/ACN/water = 10/79/11 (v/v/v), no phosphate buffer presents; analyte, 1 mg/mL Tomvitm capsules; column temperature, 40°C; injection, 20  $\mu$ L; UV detection at 205 nm.
